# Supplementary material
Source: HighWire-hosted journal article supplement (https://jitc.bmj.com/content/8/1/e000110)
Supplement: inline-supplementary-material-1 [file inline-supplementary-material-1.xlsx]

## Sheet: commonly highly expressed
lncRNAs
LINC00116
P2RX5-TAX1BP3
ENSG00000267058
ENSG00000268001
FAM30A
LOC286437
LOC100132287
ENSG00000282508
LOC100132062
ENSG00000230724
LOC100133331
LOC729737
ENSG00000260735
LINC01000
ENSG00000235989
ENSG00000204282
ENSG00000271856
ENSG00000253352
ENSG00000232628
ENSG00000218510
HCG26
MGC27345
ENSG00000182057
ENSG00000213599
MMP24-AS1
ENSG00000245060
ENSG00000251022
ENSG00000236423
ENSG00000282851
RAB4B-EGLN2
ENSG00000178977
ENSG00000225733
CHKB-CPT1B
MIA-RAB4B
LOC729683
ENSG00000260260
ENSG00000265148
ENSG00000280634
ENSG00000245954
ENSG00000241990
ENSG00000196756
ENSG00000228106
ENSG00000267100
MROH7-TTC4
ENSG00000204261
ENSG00000277147
ENSG00000228315
ENSG00000206337
LOC100996255
ENSG00000264247
TOPORS-AS1
ENSG00000268996
ENSG00000247982
EEF1E1-BLOC1S5
LOC103021295
NCBP2-AS2
ENSG00000247556
ENSG00000265479
ENSG00000197180
ATP2B1-AS1
ATP6V1G2-DDX39B
SPECC1L-ADORA2A
ENSG00000223745
ENSG00000258791
ENSG00000197989
ENSG00000232956
ENSG00000260032
ENSG00000272752
SERF2-C15ORF63
TMEM256-PLSCR3
ENSG00000281649
ENSG00000278970
ENSG00000163597
LOC100289333
ENSG00000266402
ENSG00000226950
ENSG00000254635
ENSG00000234741
ENSG00000240567
LINC00493
ENSG00000203875
BLOC1S5-TXNDC5
LOC100506136
ENSG00000255717
SENP3-EIF4A1
ENSG00000224032
ENSG00000177410
ENSG00000269893
RNASEK-C17orf49
ENSG00000251562
ENSG00000245910

## Sheet: cell-type specific over-express
Immune cell type	lncRNAs
Neutrophils	BIN3-IT1
NKT activated	ENSG00000153363
CD8 T cell activated	ENSG00000177234
Myeloid dendritic cells	ENSG00000180279
Plasmacytoid dendritic cells	ENSG00000181908
CD8 T cell activated	ENSG00000184224
Dendritic cells activated	ENSG00000185433
Plasmacytoid dendritic cells	ENSG00000188185
Eosinophils	ENSG00000189223
Neutrophils	ENSG00000196668
Mast cells activated	ENSG00000206195
Dendritic cells activated	ENSG00000206573
CD8 T cell resting	ENSG00000214049
Immature dendritic cells	ENSG00000214401
CD8 T cell resting	ENSG00000214783
T helper 17	ENSG00000214900
Plasmacytoid dendritic cells	ENSG00000215424
Monocytes	ENSG00000215458
CD8 T cell resting	ENSG00000219665
Immature dendritic cells	ENSG00000224596
CD8 T cell activated	ENSG00000224958
Eosinophils	ENSG00000225470
Myeloid dendritic cells	ENSG00000225756
T helper 17	ENSG00000225986
Immature dendritic cells	ENSG00000226137
Plasmacytoid dendritic cells	ENSG00000226806
Neutrophils	ENSG00000227591
T gamma delta	ENSG00000228391
Plasmacytoid dendritic cells	ENSG00000228812
Dendritic cells resting	ENSG00000229891
Mast cells activated	ENSG00000230148
Plasmacytoid dendritic cells	ENSG00000231177
NKT activated	ENSG00000231249
Plasmacytoid dendritic cells	ENSG00000232229
CD8 T cell resting	ENSG00000232837
NKT activated	ENSG00000233093
Mast cells activated	ENSG00000233338
Dendritic cells resting	ENSG00000233392
Dendritic cells activated	ENSG00000233834
Monocytes	ENSG00000233901
Plasmacytoid dendritic cells	ENSG00000234912
Immature dendritic cells	ENSG00000236700
Mast cells activated	ENSG00000236719
B cell activated	ENSG00000236901
CD8 T cell resting	ENSG00000237310
CD8 T cell activated	ENSG00000237870
Neutrophils	ENSG00000238113
Eosinophils	ENSG00000239213
Plasmacytoid dendritic cells	ENSG00000242258
Mast cells activated	ENSG00000244300
CD4 T cell resting	ENSG00000245849
Mast cells activated	ENSG00000246100
Mast cells activated	ENSG00000247095
Mast cells activated	ENSG00000248092
Mast cells activated	ENSG00000249550
Neutrophils	ENSG00000249662
NKT activated	ENSG00000249859
Neutrophils	ENSG00000250616
Dendritic cells activated	ENSG00000250742
Dendritic cells activated	ENSG00000251136
Neutrophils	ENSG00000251230
CD8 T cell resting	ENSG00000254622
CD8 T cell resting	ENSG00000255145
CD4 T cell resting	ENSG00000255455
CD8 T cell resting	ENSG00000256073
CD8 T cell resting	ENSG00000256508
CD8 T cell resting	ENSG00000257242
Neutrophils	ENSG00000257337
Plasmacytoid dendritic cells	ENSG00000258441
Immature dendritic cells	ENSG00000259225
Plasmacytoid dendritic cells	ENSG00000259408
CD8 T cell resting	ENSG00000259446
Eosinophils	ENSG00000260629
CD4 T cell activated	ENSG00000260807
Plasmacytoid dendritic cells	ENSG00000261485
B cell activated	ENSG00000263327
CD8 T cell resting	ENSG00000264515
T helper 17	ENSG00000264575
T helper 17	ENSG00000264920
CD8 T cell resting	ENSG00000265933
Mast cells activated	ENSG00000267272
NK resting	ENSG00000267322
Plasmacytoid dendritic cells	ENSG00000267532
Plasmacytoid dendritic cells	ENSG00000267690
Plasmacytoid dendritic cells	ENSG00000268895
CD8 T cell resting	ENSG00000269037
Plasmacytoid dendritic cells	ENSG00000269609
Plasmacytoid dendritic cells	ENSG00000270641
Mast cells activated	ENSG00000271858
NK resting	ENSG00000272419
Plasmacytoid dendritic cells	ENSG00000274253
NKT activated	ENSG00000276116
Plasmacytoid dendritic cells	ENSG00000280927
Dendritic cells resting	GBAT2
Neutrophils	GSEC
Neutrophils	HCG27
NKT activated	IPO11-LRRC70
T gamma delta	LINC00094
NKT activated	LINC00515
NKT activated	LINC00597
Mast cells activated	LINC01296
CD8 T cell resting	LINC01676
NK resting	LOC100130744
NK resting	LOC100130872
CD8 T cell resting	LOC100270804
Mast cells activated	LOC100506844
CD8 T cell activated	LOC100506990
Plasmacytoid dendritic cells	LOC100630923
Plasmacytoid dendritic cells	LOC101926943
T gamma delta	LOC101927204
Neutrophils	LOC101927759
Dendritic cells activated	LOC101927811
Neutrophils	LOC101928718
Neutrophils	LOC643072
Plasmacytoid dendritic cells	MGC12916
Mast cells activated	MSH5-SAPCD1
Eosinophils	PPT2-EGFL8
