# Supplementary material
Source: HighWire-hosted journal article supplement (https://jitc.bmj.com/content/8/1/e000110)
Supplement: inline-supplementary-material-3 [file inline-supplementary-material-3.xlsx]

## Sheet: Sheet1
Immune type cell	lncRNAs
Dendritic cells	LINC00158
Mast cells	LINC01234
Mast cells	TLR8-AS1
NKT	LINC00892
NKT	LINC00515
Plasmacytoid dendritic cells	AP003774.1
Plasmacytoid dendritic cells	LINC00996
Plasmacytoid dendritic cells	LOC101926943
Mast cells	LINC01296
